# **Influence of prior beliefs on perception in early psychosis: effects of illness stage and hierarchical level of belief**

*J. Haarsma<sup>1</sup>, F. Knolle<sup>1</sup>, J.D. Griffin<sup>1</sup>, H. Taverne<sup>1</sup>, M. Mada<sup>2</sup>, I.M. Goodyer<sup>1</sup>, the NSPN Consortium, P.C Fletcher<sup>1,3,4</sup>, G.K. Murray<sup>1,4</sup>*

<sup>1</sup>Department of Psychiatry, University of Cambridge, United Kingdom,

<sup>2</sup>Cognition and Brain Sciences Unit, University of Cambridge, United Kingdom

<sup>3</sup>Wellcome Trust MRC Institute of Metabolic Science, Cambridge Biomedical Campus, United Kingdom,

<sup>4</sup>Cambridgeshire and Peterborough NHS Foundation Trust, United Kingdom

## **Correspondence to:**

Dr Murray Department of Psychiatry, University of Cambridge, United Kingdom  
(gm285@cam.ac.uk)

## Abstract

Alterations in the balance between prior expectations and sensory evidence may account for faulty perceptions and inferences leading to psychosis. However, uncertainties remain about the nature of altered prior expectations and the degree to which they vary with the emergence of psychosis. We explored how expectations arising at two different levels – cognitive and perceptual – influenced processing of sensory information and whether relative influences of higher and lower level priors differed across people with prodromal symptoms and those with psychotic illness. In two complementary auditory perception experiments, 91 participants (30 with first episode psychosis, 29 at clinical risk for psychosis, and 32 controls) were required to decipher a phoneme within ambiguous auditory input. Expectations were generated in two ways: an accompanying visual input of lip movements observed during auditory presentation, or through written presentation of a phoneme provided prior to auditory presentation. We determined how these different types of information shaped auditory perceptual experience, how this was altered across the prodromal and established phases of psychosis, and how this relates to cingulate glutamate levels assessed by magnetic resonance spectroscopy. The psychosis group relied more on high level cognitive priors compared to both healthy controls and those at clinical risk for psychosis, and more on low level perceptual priors than the clinical risk group. The risk group were marginally less reliant on low level perceptual priors than controls. The results are consistent with previous theory that influences of prior expectations in psychosis in perception differ according to level of prior and illness phase.

## 1.1. Background

It has been hypothesized that the brain forms a model of the world by actively trying to predict it and to update these predictions iteratively by function of the prediction error, a hierarchical computational framework usually referred to as predictive coding (Rao & Ballard et al., 1999; Bar, 2009; Friston, 2005 & 2009; Bastos et al., 2012; Clark et al., 2013 & 2015; Hohwy et al., 2013; Knill et al., 2004). In this framework, the formation of delusional beliefs and hallucinatory experiences are proposed to be due to alterations in the cognitive and biological mechanisms of predictive coding (Fletcher & Frith, 2009; Adams et al., 2013).

Whilst initial clinical studies documenting alterations in the way the expectation influences perception in psychosis are promising in demonstrating case-control alterations in various behavioural measures of predicting coding (eg Shergill et al 2005, Teufel et al., 2010; Powers et al 2017), it is already clear that there will be no straightforward unifying explanation of psychosis in simple terms of priors being “too strong” or “too weak” in general. Predictive processing theory envisions a highly interlinked (cortical) cognitive hierarchy, where different layers aim to predict the incoming input from lower-layers (Rao & Ballard et al., 1999; Bar et al., 2009; Friston, 2005 & 2009; Bastos et al., 2012; Clark et al., 2013 & 2015; Hohwy et al., 2013; Knill et al., 2004). Moving up the hierarchy, the predictions become more abstract, ranging from lower-level sensory prediction to higher-order beliefs about the environment. It therefore does not suffice to ask the question whether prior expectations are stronger or weaker in psychosis. Instead in order to form a complete picture of the underlying mechanisms of psychosis, we need to look at the contribution of different types of prior expectations, including both sensory expectations and higher-level beliefs about the environment.

Recent influential predictive coding accounts of psychosis have emphasized that priors at low and high hierarchical levels may be differentially affected in psychotic illness. For example, Sterzer et al (2018) conclude that “In contrast to weak low-level priors, the effects of more abstract high-level priors may be abnormally strong” in

psychosis. This postulate is mainly drawn through a combination of theoretical arguments and synthesis across diverse studies. To our knowledge no single study has yet demonstrated a combination of weak low-level perceptual priors and strong high-level cognitive priors in patients with psychosis, although Schmack (2013) and colleagues provided supportive evidence in a study of individual differences in healthy individuals. Those authors delineated priors at different hierarchical levels by manipulating what they referred to as perceptual priors and cognitive priors in two related experiments; they found that delusional ideation in health (sometimes termed delusion proneness) was associated with a decrease in the contribution of perceptual priors, and an increase in the contribution of cognitive priors, highlighting the importance to separate the two (Schmack et al., 2013). Clearly, clinical studies are required testing the hypothesis of simultaneous weak low-level and strong high-level priors in psychotic illness, yet few have been attempted. One exception was another study from Schmack and colleagues, who found evidence against differential strengths of sensory and cognitive priors in schizophrenia (Schmack et al 2017).

A further complexity is that cognitive and biological mechanisms of psychosis may be markedly different at different illness stages, adding nuance to the attractive, yet arguably overly simplistic, continuum model of psychosis. Previous reviews (for example by Sterzer and colleagues (2018) and Adams and colleagues (2013)) acknowledge that there may be evolving patterns of cognitive and/or physiological disturbances over time as psychotic illness develops. In many cases psychotic illness is heralded by the development of delusions (often delusional interpretations of hallucinations) after a prodromal period of hallucinatory experiences without delusional interpretation and/or delusional mood. It has been argued that that in the context of weak low level priors, delusions may emerge as result of compensatory increases in the precision of high-level beliefs (i.e. enhanced high level, cognitive priors) (Adams et al 2013). It follows then that in the very early phases of psychosis, prior to the development of delusions, such compensatory increases in the precision of high level beliefs may be yet to emerge. Although one previous study found alterations in the utilisation of priors in individuals at clinical risk for psychosis (putatively in the prodrome) compared to controls (Teufel et al 2015), this study did

not include any patients with established psychotic illness, and thus none of the sample had developed delusions at the time of the experiment. It thus remains unclear whether, or how, alterations in the use of higher or lower level priors changes as psychotic illness emerges.

We acknowledge the vital importance of the range of previous studies exploring the contribution of prior expectation in perception in psychosis. However, here we argue that two important aspects of the predictive coding account have been largely neglected in empirical clinical studies: the contribution of different disease stages to the effect of prior expectations, and the type of prior expectation. It is the aim of the present study to bring these two together, by studying how different prior expectations are affected throughout individuals at risk for psychosis and individuals who recently had an episode of psychosis.

In order to test the hypothesis that sensory and cognitive priors are differently used depending on the stage of psychosis, we designed two novel auditory perception paradigms, one testing the influence of lip-movements on auditory perception (perceptual priors) and a second testing the influence of learned written-word-sound associations on auditory perception (cognitive priors); and we gathered data on these two paradigms in two patient groups – individuals at elevated clinical risk for psychosis, and individuals who recently had their first episode of psychosis, and compared them to a group of healthy controls. Help-seeking individuals who are at-risk for psychosis usually have sub-clinical psychotic symptoms that are not severe or frequent enough to warrant a clinical diagnosis, but are at considerably raised risk of developing a psychotic illness in the short to medium term (Yung et al). Studying these early stages of illness may help us to understand the mechanisms underlying the emergence of a psychosis by examining which aberrancies precede psychosis and might therefore be predictive of developing psychosis.

The first paradigm (from now on ‘perceptual priors task’) assesses the influence of lip-movements on auditory perception. Lip-movements have been shown to influence auditory perception. McGurk and MacDonald (1976) showed that when

individuals where presented with an auditory /Ba phoneme in combination with lip-movements pronouncing /Ga, most individuals perceive a mixture between the two, i.e. /Da. This effect has become known as the McGurk illusion (McGurk & MacDonald, 1976). Studies of the neural mechanisms underlying the influence of lip-movements on auditory perception provide support for the Bayesian framework, in that lip-movements are suggested to constitute a prior expectation with respect to the incoming auditory signal (Arnal et al., 2012; Blank & Davis, 2016). One previous study of mainly male, middle-aged adults with chronic schizophrenia documented a diminishment in perceiving the McGurk illusion, relying more on the auditory input; the finding that was associated with illness chronicity (White et al., 2014). Pearl et al (2009) also studied the McGurk illusion in schizophrenia, finding mixed results: adolescents with schizophrenia, but not adults with schizophrenia, showed a diminished illusory effect. Schizophrenia has been associated with a diminished ability in using lip-movements in aiding auditory discrimination, suggesting aberrancy in the ability to integrate the two sources of information (Myslobodsky et al., 1992; de Gelder et al., 2002; Ross et al., 2007; Szycik et al., 2013). However, it remains unclear whether the influence of prior information auditory perception is altered in the early stages of psychosis, as no previous first episode psychosis study or study of people with prodromal symptoms of psychosis has been conducted. The purpose of the perceptual priors task was to measure precisely how much lip-movements influence what participants hear by using a staircase procedure (Cornsweet, 1962), in which the balance between two sounds was changed in predefined steps, providing a more fine-grained measures of individual susceptibility to the illusion than in previous clinical studies.

The second paradigm (from now on ‘cognitive priors task’), assesses the influence of learned written-word-sound associations on auditory perception. The impact of learned associations on auditory perception has been shown in sensory conditioning, where one stimulus functions as a predictor for an auditory stimulus that is otherwise difficult to detect. In these early experiments, participants were asked to identify auditory stimuli on the basis of a visual cue. Sometimes the participants reported perceiving an auditory stimulus when only presented with the visual cue, as

the brain predicted an auditory stimulus on the basis of the cue (Ellson, 1941; Kot et al., 2002; Warburton et al., 1985; Agathon et al., 1973; Brogden et al., 1947; Powers et al., 2017). Previous research found that this omission effect is stronger in individuals with hallucinations (Kot et al., 2002; Powers et al., 2017), suggesting an increase in the influence of learned ‘cognitive’ expectation on auditory perception in psychosis, in contrast to the diminishment in the influence of ‘sensory’ expectations in schizophrenia discussed above. However, up to date, no study has explored the influence of learned cognitive expectations in individuals at-risk for psychosis and compared it to the influence of sensory expectations on perception.

Another issue currently understudied relates to the neurobiological underpinnings of alterations in the contribution of prior expectations in perception. Changes in glutamate levels have been associated with schizophrenia (Marsman et al., 2011; Merritt et al., 2016; Treen et al., 2016), including in the cingulate cortex, where there is evidence of excessive glutamate in early illness stages, possibly progressing to reductions in later stages (Merritt et al 2016, Kumar et al 2018). It remains unclear to what extent glutamate levels in the brain relate to predictive coding mechanisms putatively mediating psychosis, in spite of various theoretical arguments and extrapolations from preclinical experiments (Corlett et al., 2011; Sterzer et al 2018). We therefore explored this issue by measuring magnetic resonance spectroscopy (MRS) glutamate levels in the anterior cingulate cortex and relating these measurements to the contribution of prior expectations in the different experimental groups. Our study is not powered to provide definitive results relating glutamate measures to our predictive coding measures, the latter being of primary interest here. Nevertheless, we report preliminary, exploratory analyses that may be hypothesis generating and could provide the basis for power calculations for future studies combining MRS with behavioural data in patients.

In summary, we use a cross-sectional design to study altered use of prior expectations in auditory perception in individuals at-risk for psychosis, first episode psychosis and controls. We expect to find differences in the balance between the use of prior expectations and sensory input depending on the origin of the prior

expectation (sensory vs. cognitive) and disease stage (at-risk vs. first episode psychosis). Specifically, we expect that at early stages of psychosis (clinical risk), patients make stronger use of sensory input, but that in those with full manifestation of disease (first episode psychosis), patients would rely more on cognitive priors. A secondary hypothesis is that cortical glutamate levels will be related to changes in the usage of sensory and cognitive priors.



## **1.2.Method**

### **1.2.1. Participants**

Participants with first episode psychosis (FEP, n=30, average 24.8 years, 6 female) or at-risk mental state patients (ARMS, n=29, average 21.5 years, 8 female) were recruited from the Cambridge Early intervention service North and South. In addition, ARMS patients were recruited on the basis of belonging to a help-seeking, low-mood, high schizotypy sub-group following a latent class analysis on the (Neuroscience in Psychiatry Network (NSPN) cohort (Davis et al., 2017) or through advertisement via posters displayed at the Cambridge University counselling services. Individuals with FEP or at-risk for psychosis met FEP or ARMS criteria on the CAARMS interview. All FEP participants had current delusions or previous delusions in the case of those with partial or recent recovery. Healthy volunteers (HCS, n=32, average 22.6 years, 15 female) without a history of psychiatric illness or brain injury were recruited as control subjects. Healthy volunteers did not report any personal or family history of neurological, psychiatric or medical disorders. All participants had normal hearing and normal or corrected to normal vision. All participants gave informed consent. The study was approved by the West of Scotland (REC 3) ethical committee. See Table 1 for details on demographics and symptom scores. 3 ARMS patients and 17 FEP patients were receiving anti-psychotic medication.

### **1.2.2. Questionnaires and interviews**

We used the Cardiff Abnormal Perceptions scale (CAPS, Bell et al., 2006), Peters Delusion Index scale (PDI, Peters et al., 1999), Comprehensive Assessment for the At-risk Mental State interview (CAARMS, Yung et al., 2003) and Positive and Negative Symptoms Scale (PANSS, Kay et al., 1989) to assess “caseness”, symptom severity and frequency. Both the total scores for the CAPS and PDI and the subscales of the CAPS and PDI are reported in table 1. For the PDI and CAPS the participants were required to give a yes or a no answer to a particular question. In case of a yes answer, 3 subscales were filled in which utilised a 5-point Likert scale. The CAARMS and PANSS are semi-structured interviews, where the interviewer rates severity of various types of psychotic and other psychiatric symptoms.

### 1.2.3. Magnetic Resonance Spectroscopy

A subset of participants was scanned on a Siemens Prisma 3T scanner at the cognition brain sciences unit in Cambridge. The spectroscopy scan was part of a larger MRI protocol which contained in addition 2 fMRI protocols and a structural scan totalling 90 minutes (see chapter 2 & 6). The structural scan was used to plan the MRS voxel on. A 15mm isotropic was placed carefully in the anterior cingulate cortex. A PRESS sequence was used to assess glutamate levels, with a TR of 1880ms and TE of 30ms. 150 water-suppressed acquisitions were collected in addition to 16 unsuppressed acquisitions. Data was analysed in LCModel. MRS data was successfully collected from 18 healthy controls 19 ARMS, and 14 FEP patients.

### 1.2.4. Experiment 1 – providing perceptual priors

In the present study auditory stimuli will be presented that contain varying proportions of the phoneme /Ba or /Da (Figure 1). The balance between the two stimuli always adds up to one. The contribution of the stimulus /Ba is denoted as  $\omega^{Ba}$ , which stands for “the weight of /Ba”. The proportion of  $\omega^{Da}$  can be derived from  $\omega^{Ba}$  as  $1 - \omega^{Ba} = \omega^{Da}$ . From henceforth the notation  $\omega^{Ba}$  be used to indicate what exactly was presented to participants in terms of auditory stimulus.

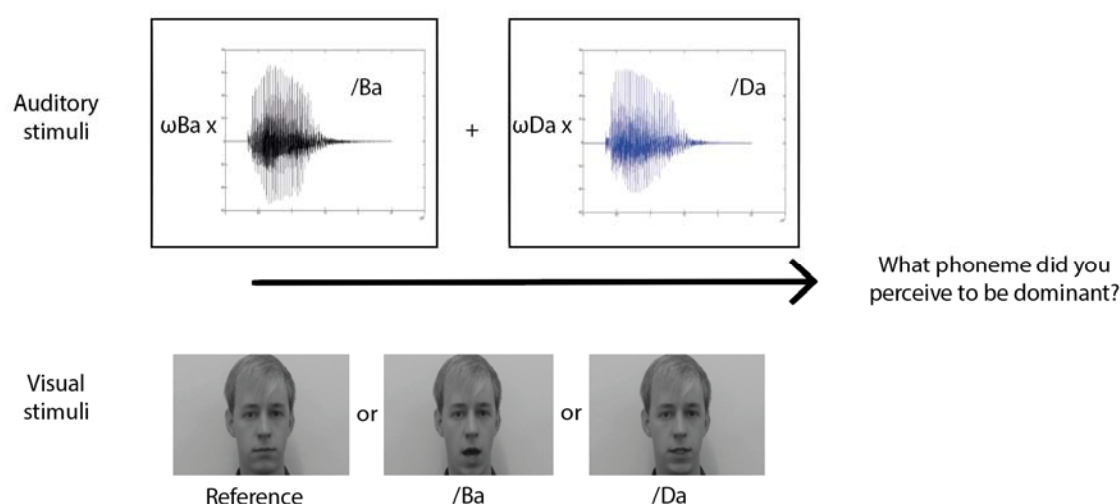

Figure 1: Procedure of the sensory prior task. The participant was presented between a mixture of the phonemes /Ba and /Da (above) which co-occurred with either a still face (reference condition) or lip-movements pronouncing /Ba or /Da

### Training phase

The task started with a training phase. The purpose of which was to familiarize the participants with the auditory stimuli. Here they were presented with a still face in combination with an auditory stimulus consisting of a stimulus  $\omega^{Ba}=.8$  or  $\omega^{Ba}=.2$ . They were then asked to report which sound they believed was dominant, after which they received feedback (correct/incorrect). The training was completed as soon as participants reported the correct answer 4 times for each stimulus. All participants identified the phonemes correctly.

### Testing phase

During the testing phase, the participants were presented with an auditory stimulus consisting of a mix between the sound /Ba and /Da (as described above), which simultaneously occurred with a visual stimulus consisting of a black and white male face. The face would pronounce either /Ba or /Da (lip-movement condition), or the face would remain still (the reference condition). All three conditions were presented in a pseudo-randomised order such that all three conditions were presented in a random order before one of the conditions is presented again. The participants were instructed to keep looking at the lips of the face throughout the task, but asked to report what phoneme was dominant in the auditory stimulus by pressing one of four buttons indicating the level of certainty and the perceived phoneme.

During the main task, the balance between the /Ba and /Da phoneme was changed in a stepwise fashion. That is, when the participant reported the sound /Ba to be dominant in for example the reference condition, then the next time that condition came up, the balance between the sound /Ba and /Da would have been shifted in favour of the non-reported phoneme, in this case: /Da. By following this procedure, the task would converge towards a point where the participant would find it difficult to distinguish which of the phonemes is dominant in the auditory stimulus. This point is referred to as the perceptual indifference point. In the reference condition, where no lip-movements were presented, we expected the perceptual indifference

point to converge on a stimulus which contains .5 of /Ba and .5 of /Da. However, when lip-movements, for example pronouncing /Ba were presented to bias perception towards the prior expectation, we expected that the task converged upon an indifference point that contained less auditory /Ba, and more auditory /Da. In other words, more auditory /Da was needed to overcome the influence that the /Ba lip-movements had (see Figure 2 for an example of a staircase).

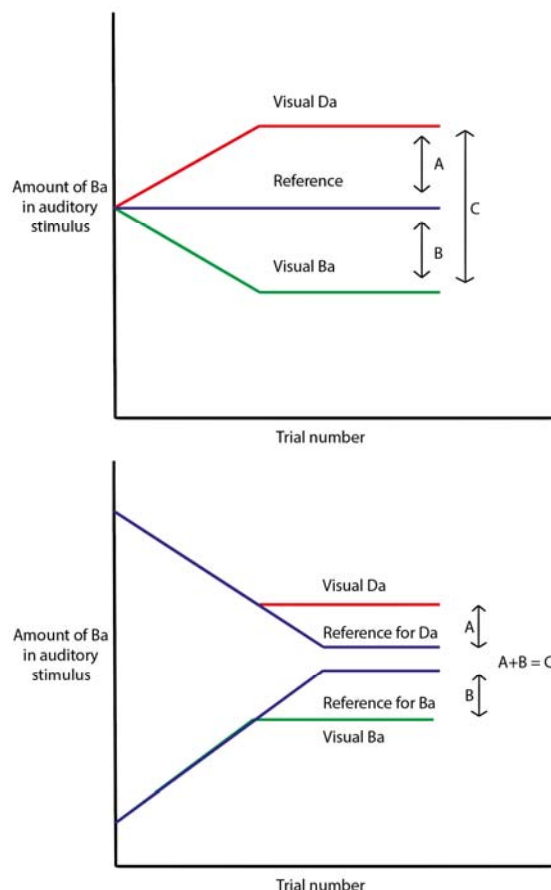

Figure 2: Schematic representation of a staircase in the perceptual priors task (upper panel) and cognitive priors task (lower). The experiment adjusted the balance between /Ba and /Da during the experiment in favour of the non-reported stimulus (slope line), ensuring convergence to a subject threshold (flat line). The distance A indicates the strength of the Da prior, whereas B indicates the strength the Ba prior. C is a total measure of prior strength irrespective of the specific prior presented.

For each of the three conditions (Reference, /Da and /Ba), the perceptual indifference point was assessed twice: Once where the auditory stimulus started with a dominant /Ba stimulus ( $\omega^{Ba}=.7$ ,  $\omega^{Da}=.3$ ) and once where /Da was dominant ( $\omega^{Ba}=.3$ ,  $\omega^{Da}=.7$ ). This created 6 conditions, which were presented to the participant

in pseudorandom order. A condition was completed as soon as the participant had reached the perceptual indifference point. This was defined as (1) having made 6 switches in perceiving one stimulus over the other (e.g. previously perceiving /Ba on trial t-1 and perceiving /Da on t0, indicating the balance between the two auditory stimuli is close to the participants perceptual indifference point); or (2) indicating that the sound /Ba or /Da is 100% dominant in the auditory stimulus (e.g. a participant perceived /Da, even though the stimulus is 100% /Ba/ which could happen when the visual priors are dominating perception). A condition was aborted when 30 trials had been presented avoiding the task from taking too long. In order to test for group and condition differences in the amount of trials needed to reach an indifference point and a possible interaction, we used a mixed-ANOVA with group as between subject factor and visual condition as within subject factor.

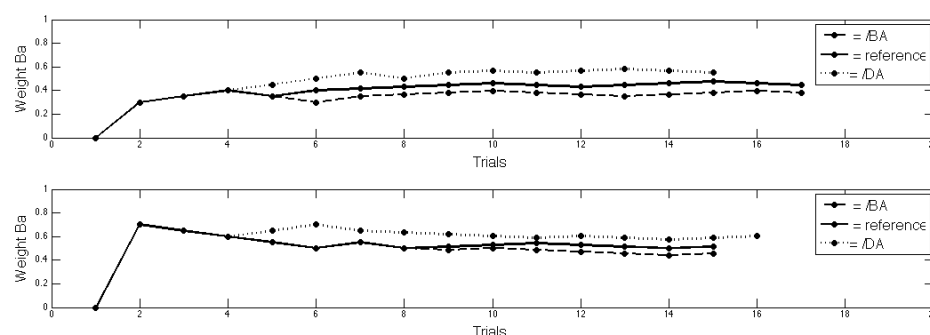

Figure 3: Example of the staircase procedure. All 6 of the conditions are represented here. The top figure shows the 3 visual conditions where the staircase started at  $w^{Ba}=3$ , whereas the bottom figure shows the 3 visual conditions where the staircase started at  $w^{Ba}=7$ .

At the beginning of the staircase, the balance between /Ba and /Da was changed in steps of .05. After the first switch, the balance was changed in steps of .015. This procedure ensured that the first switch was reached quickly. Thereafter the staircase became more sensitive so that the perceptual indifference point could be assessed more precisely. The strength of each of the visual priors was calculated separately by taking the difference between the perceptual indifference point of the visual prior condition and the reference condition (see Figure 2 upper panel: A and B). The total strength of the visual priors was calculated by taking the distance between the indifference points of both sensory prior conditions (see Figure 2 upper panel: C).

### 1.2.5. Experiment 2 – providing cognitive priors

#### Training phase

The cognitive priors task was designed to measure how much a learned cue would influence what participants hear. During the training phase participants learned the association between the letters BA and the phoneme /Ba, and vice versa for DA. In 75% of the training trials the letters BA or DA were presented 500ms prior to hearing the auditory stimulus which consisted of  $\omega^{Ba}=.3$  and  $\omega^{Da}=.7$  when preceded by the letters DA or  $\omega^{Ba}=.7$  and  $\omega^{Da}=.3$  when preceded by the letters BA, making the letters predictive of the auditory stimuli. In the other 25% of the trials, no sound was presented following the letters. Here the participants were asked to report what they expected to hear. The training was complete as soon as the participants indicated 8 times that they expected to hear the /Ba following the letters BA and /Da following the letters DA.

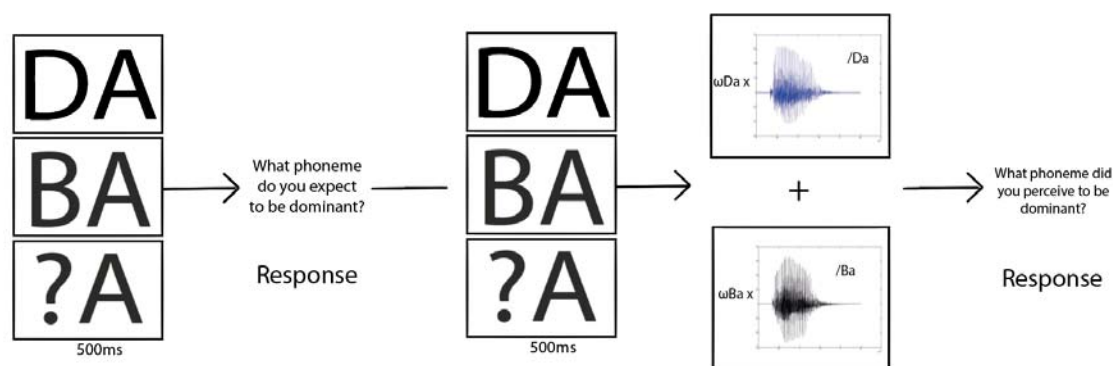

Figure 4: Procedure of the cognitive prior task. Cognitive priors were presented which the participant learned to be predictive of upcoming auditory stimuli. The participant was asked to then state what he or she expected to hear, after which the participant was presented with the auditory stimulus.

#### Testing phase

The cognitive priors task is similar to the perceptual priors task, in that participants were instructed to report which sound they believed to be dominant under different prior expectations. However, this time the prior expectations came from learned written word-sound associations. Again, the main task consisted of 3 conditions, a cognitive prior BA and DA condition, and a reference condition, which consisted of

the letter '?A'. Each trial started with the presentation of the letters 'BA', 'DA' or '?A'. After seeing 'BA' or 'DA', participants were asked which phoneme they expected to perceive, which they indicated using one of 4 buttons indicating the perceived phoneme and certainty like in the perceptual priors task. The participants were only asked to indicate their prediction following seeing the letters 'BA' and 'DA', but not after seeing '?A'. By making a conscious prediction regarding the upcoming stimulus, the use of the cognitive prior could be validated. In the reference condition, no reliable prediction could be generated as both options were equally likely. 500ms after they made a decision or the reference stimulus had been presented, the auditory stimulus was presented. Subsequently, participants indicated what they perceived to be the dominant stimulus (see Figure 4).

Again, the balance between the auditory phoneme /Ba and /Da was shifted in favour of the non-reported stimulus in a step-wise fashion. However, in contrast to the perceptual priors task, each condition was presented once for each cognitive prior BA and DA, instead of twice. Within the cognitive BA prior condition, the staircase started at  $\omega^{Ba} = .7$  and  $\omega^{Da} = .3$ , meaning the auditory stimulus was relatively clearly a /Ba sound. The same is true for the cognitive DA prior condition, where the staircase started at  $\omega^{Ba} = .3$   $\omega^{Da} = .7$ , meaning the auditory stimulus was relatively clearly a /Da sound. This matching of the auditory stimulus to the cognitive prior condition at the beginning of the staircase was done to reaffirm the association between the prior and the sound, otherwise the association between the cue and sound could have been lost immediately in the beginning of the staircase. Note that if we would compare the difference in perceptual indifference points in the two cognitive prior conditions, we would have a confound, as the staircases for the two cognitive prior conditions started at different intensities, explaining any differences between the two conditions. Therefore, we introduced two reference conditions to which the prior conditions can be compared, getting rid of the confound. These consisted of the letters '?A', one of which had a staircase starting at  $\omega^{Ba} = .7$  and  $\omega^{Da} = .3$  so it could be directly compared to the cognitive BA prior, the other starting at  $\omega^{Ba} = .3$   $\omega^{Da} = .7$ , so it could be directly compared to the cognitive DA prior. As in the first task, at the beginning of the staircase procedure, the balance between /Ba and

/Da was again changed in steps of .05. Then, after the first switch, the balance was changed in steps of .015.

In total, the cognitive priors task consisted of 4 conditions: a BA and a DA condition, a reference condition for BA, and a reference condition for DA. The order of the condition per participants was pseudorandomised. In each condition, a perceptual indifference point was assessed.

The perceptual indifference point for each condition was quantified by taking the average of  $\omega^{Ba}$  at the last two switches. In order to quantify the strength of each prior, these perceptual indifference points were subtracted from their reference condition, and the total cognitive prior strength was calculated by adding the strength of separate priors (see Figure 2 lower panel).

#### **1.2.6. Stimuli, Apparatus and Procedure**

Participants completed two tasks: the perceptual priors task first and the cognitive priors task second. Each task was performed on a MacBook Pro, Retina, 13-Inch, Early 2013, and each lasted on average about 10 minutes. Participants wore Sennheiser Headphones to ensure optimal hearing. Both the Ba and the Da stimuli had an intensity of 68dB. All participants reported perceiving the auditory stimuli clearly. The experiment was conducted in an environment with minimal background noise, ensuring minimal distraction of the participant (<15dB).

Psychtoolbox-3 was used to design the experiment. The auditory stimulus in both the perceptual priors task and the cognitive priors task consisted of a mixture of a natural speech male voice /Ba phoneme and a /Da phoneme. The auditory stimulus was created by multiplying the auditory spectrum of the /Ba stimulus by a weighting factor  $\omega^{Ba}$ . This was then added to a weighted auditory spectrum of /Da (where  $\omega^{Da} = 1 - \omega^{Ba}$ ) ensuring the total of auditory stimulus to always be 1 (stimulus =  $(\omega^{Ba} \times Ba) + (\omega^{Da} \times Da)$ ).



### 1.2.7. Analyses

Since this is a novel paradigm, we first wanted to establish whether the variables of interest were reliable in the sense that two separate measurements of the variable were highly correlated. Since we assessed the perceptual indifference points twice in each condition, we were able to test the correlation between two separately obtained measurements, giving an indication of their reliability. We tested the reliability of two separate variables. First, we tested the reliability of the indifference points in the condition without a perceptual prior, which should give an indication of the reliability of the staircase method. Second, we tested the reliability of the strength of the perceptual priors, which give an indication of the reliability of the method to measure the influence of lip-movements on auditory perception. Furthermore we tested whether the perceptual and cognitive priors were correlated with each other. Due to non-normality of the cognitive priors task, a Spearman correlation was used to assess this.

One-tailed paired-tests were used to test for a main effect of whether the lip-movements shifted the perceptual indifference points in the expected direction compared to the reference condition. This was done for both the sensory and cognitive prior tasks.

In order to test the hypothesis that perceptual priors and cognitive priors were different across groups, we computed the influence of the prior for each individual as described above, and used a one-way ANOVA with two-tailed post-hoc Bonferroni corrected t-tests if applicable. Furthermore, a Kruskal Wallis non-parametric ANOVA was used with cognitive prior data, with Bonferroni corrected non-parametric post-hoc t-tests. We also report the results of Bayesian statistical tests in relation to the group differences using JASP.

### 1.3.Results

Table 1: Demographics and symptom scores participants in the study

|                   | HC        | ARMS       | FEP        | <i>p-value</i> |
|-------------------|-----------|------------|------------|----------------|
|                   | 32        | 29         | 30         |                |
| <b>PANSS</b>      | 13.1(4.6) | 26.7(12.1) | 31.6(12.3) | <.001          |
| <i>Positive</i>   | 6.5(2.3)  | 13.6(5.7)  | 18.0(6.9)  | <.001          |
| <i>Negative</i>   | 6.6(2.4)  | 13.1(7.5)  | 13.6(7.7)  | <.001          |
| <b>MFQ</b>        | 8.5(5.1)  | 33.2(17.4) | 31.8(23.6) | <.001          |
| <b>CAPS</b>       | 32.9(1.4) | 44.1(7.0)  | 43.6(9.7)  | <.001          |
| <i>Distress</i>   | 1.6(3.0)  | 29.8(20.9) | 32.1(33.9) | <.001          |
| <i>Intrusive</i>  | 2.2(3.7)  | 34.9(22.8) | 38.5(37.4) | <.001          |
| <i>Frequency</i>  | 1.3(2.3)  | 28.3(17.8) | 29.7(31.1) | <.001          |
| <b>PDI total</b>  | 22.4(1.5) | 29.3(4.5)  | 31.1(6.5)  | <.001          |
| <i>Distress</i>   | 2.4(2.8)  | 24.1(16.9) | 28.0(23.9) | <.001          |
| <i>Intrusive</i>  | 2.4(2.7)  | 23.6(17.4) | 29.5(22.9) | <.001          |
| <i>Conviction</i> | 3.6(4.0)  | 24.9(15.9) | 31.0(25.3) | <.001          |
| <b>Age</b>        | 22.4(3.7) | 21.8(3.5)  | 25.1(4.8)  | <.01           |
| <b>Proportion</b> |           |            |            |                |
| <b>Males</b>      | 17        | 21         | 24         | >.05           |

### **1.3.1. Perceptual priors task**

#### **1.3.1.1. No difference between groups in the amount of trials needed to assess perceptual indifference point**

On average participants required 18.9 trials to reach a perceptual indifference point across all conditions. We found no overall effect of group on the trials needed to reach a perceptual indifference point ( $F_{(2,87)}=.262$ ,  $p=.77$ ) (HCS: 19.1, SE: 0.5; ARMS: 19.1, SE:0.6; FEP: 18.6, SE: 0.4). However, we did find an effect of prior condition ( $F_{(2,174)}=17.1$ ,  $p<.001$ ). Needing fewer trials in the visual reference condition (17.3, SE: 0.3) then in the visual BA (18.9 SE: 0.4) and visual DA condition (20.7, SE: 0.54). Importantly, we found no group by condition interaction ( $F_{(4,174)}=.456$ ,  $p=.77$ ). Thus, the patient groups did not differ in terms of the trials needed to reach indifference points.

#### **1.3.1.2. Individual perceptual indifference points can be estimated reliably**

The perceptual indifference point for each visual condition was assessed twice in the perceptual priors task. As this is a novel task, we tested whether these simultaneously assessed indifference points correlated strongly, as that would give us an indication of the reliability of the measurement. First, we correlated the indifference points in the condition where no priors were presented (the reference condition). Across groups the correlation was  $r=.70$ . Separately it was  $r=.81$  for HC,  $r=.71$  for ARMS and  $.51$  for FEP (all  $p<.01$ ). Second, in a similar fashion, we assessed how strongly the effect of the perceptual priors was correlated across the two simultaneously assessed staircases. The reliability of the strength of the perceptual priors across groups was  $r=.62$ . Separately, it was  $r=.64$  for HCS,  $r=.85$  for ARMS and  $.47$  for FEP (all  $p<.01$ ) (Figure 5). For the remainder of the analyses we averaged for each visual condition (Ba Da and reference) the perceptual indifference points, and the estimation of the sensory prior strength (Figure 2).

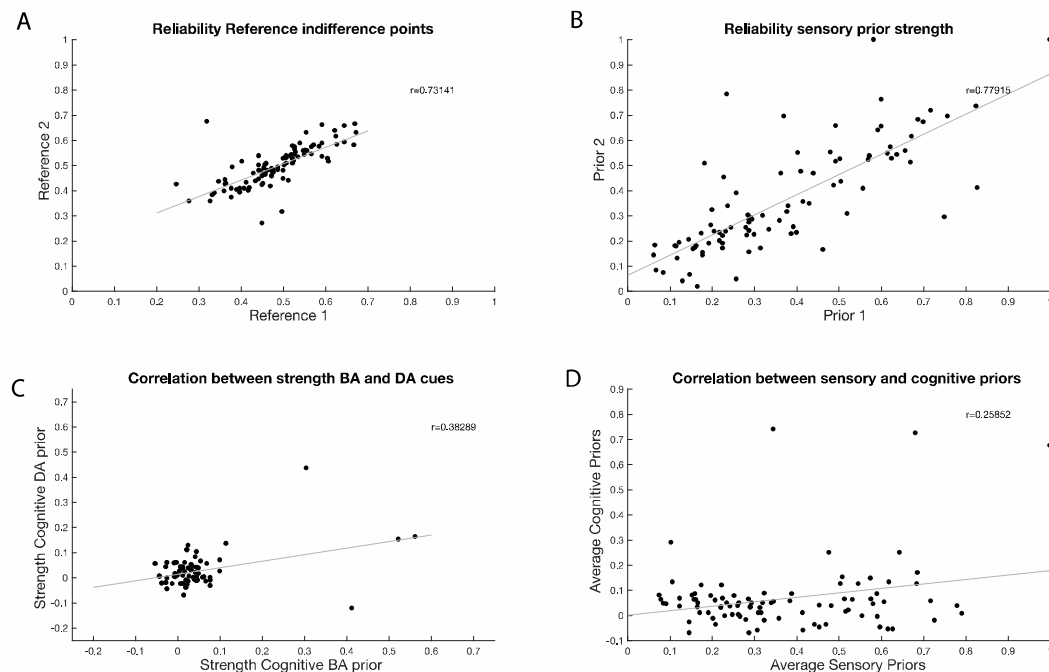

Figure 5: Correlations testing the reliability of the experiment are presented here. A: reliability of the perceptual indifference point in the reference condition. B: reliability of the strength of perceptual priors. C: Correlation between the effect of cognitive Ba stimulus and the cognitive Da stimulus. D: correlation between sensory and cognitive priors.

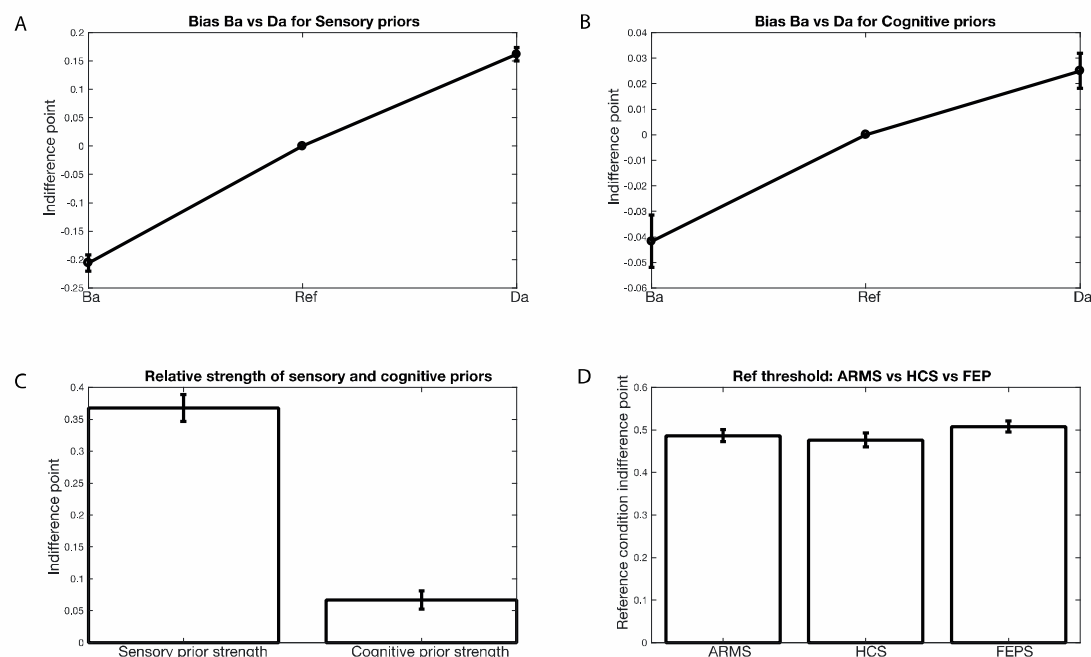

Figure 6: Main effects of the sensory and cognitive priors are presented here. A: relative shift in perceptual indifference points under different sensory prior conditions (lip movements pronouncing /Ba or /Da) compared to reference condition (still lips). B: relative shift in perceptual indifference points under different cognitive prior conditions (the letters 'BA' and 'DA') compared to reference condition (letters '?A'). C: relative strength of perceptual priors and cognitive priors. D: the perceptual indifference points in the reference conditions per group (effect of no interest).

### 1.3.1.3. Perceptual priors shifted the perceptual indifference points in the expected direction

We tested whether the perceptual priors shift the perceptual indifference points in the expected directions compared to the reference condition. On average, across all groups taken together, Ba lip-movements lowered the value of  $\omega^{Ba}$  in the perceptual indifference point by .21 (95% ci: .18-.23,  $T\{89\}=14.0$ ,  $p<.0001$ ). In contrast, Da lip-movements increased the value of  $\omega^{Ba}$  in the perceptual indifference point by .16 (95% ci: .14-.18,  $T\{89\}=13.2$ ,  $p<.0001$ ) on average. When comparing the relative strength of the Ba and Da lip-movements, we found a significant difference ( $T\{178\}=2.29$ ,  $p=.022$ ), indicating a slightly stronger effect of Ba lip-movements than Da (Figure 6B).

### 1.3.1.4. The perceptual indifference point in the reference condition was equal across groups

Analysing group differences, the perceptual indifference point in the reference condition was a variable of no interest, as it merely reflects a personal preference for either the auditory /Ba or /Da stimulus. Indeed, the average perceptual indifference point in the reference condition across groups in reference groups was equal ( $M^{\text{HCS}}=.48$   $SE^{\text{HCS}}=.02$ ,  $M^{\text{ARMS}}=.49$   $SE^{\text{ARMS}}=.01$ ,  $M^{\text{FEP}}=.51$   $SE^{\text{FEP}}=.01$ ;  $F_{\{2,88\}}=1.02$ ,  $p=.36$ ) (Figure 6D).

### 1.3.1.5. Perceptual priors were significantly lower in ARMS compared to FEP

To test whether the perceptual priors were significantly different across groups, we conducted a one-way ANOVA. We indeed found evidence for a difference across groups ( $F_{\{2,88\}}=5.32$ ,  $p=.007$ ; Figure 7A, 7C). Bonferroni corrected post-hoc T-tests revealed a significant difference between ARMS ( $M^{\text{ARMS}}=.28$   $SE^{\text{ARMS}}=.03$ ) and FEP ( $M^{\text{FEP}}=.44$   $SE^{\text{FEP}}=.04$ ) ( $p=.005$ ), but not between healthy controls ( $M^{\text{HCS}}=.37$   $SE^{\text{HCS}}=.04$ ) and ARMS ( $p=.20$ ) or FEP ( $p=.44$ ).

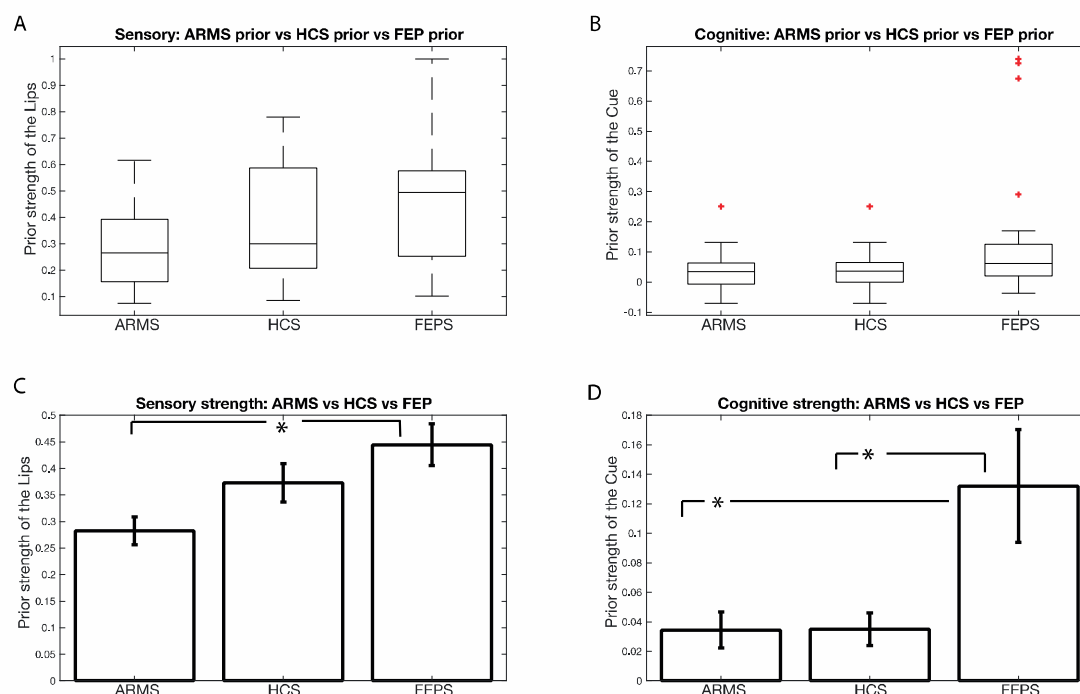

*Figure 7: The effects per group are presented here in boxplot and bar graphs displaying mean ( $\pm$  sem) A: boxplot of the effect of perceptual priors across groups. B: Boxplot of the effect of cognitive priors across groups. C: The effect of perceptual priors across groups. D: The effect of cognitive priors across group. \* =  $p < .05$*

We furthermore analysed the perceptual prior data in a Bayesian fashion. For this section we use Jeffreys's (1961) suggested evidence categories for the Bayes factor. We found that an ANOVA revealed moderate evidence in support for a difference across groups ( $BF=6.3$ ). Independent-sample t-tests revealed anecdotal evidence in favour of a difference between ARMS and healthy controls ( $BF=1.4$ ), but anecdotal evidence in favour of no difference between healthy controls and FEP ( $BF=1.8$ ). There was strong evidence for a difference between ARMS and FEP ( $BF=26.1$ ) (Figure 7A, 7C).

### **1.3.2. Cognitive priors task**

#### **1.3.2.1. FEP needed on average an extra trial to finish the training phase**

We first tested whether the different experimental groups differed in the amount of trials needed to end the training using an ANOVA. The groups differed significantly in the number of trials needed ( $F_{2,88}=3.34$ ,  $p=.040$ ). The HC group and the ARMS group required on average 8.7 trials and 8.8 trials respectively before the training was finished, whereas the FEP required on average 9.9 trials.

#### **1.3.2.2. No difference between groups in the amount of trials needed to assess perceptual indifference point**

During the actual experiment, the participants generally required 18.5 trials to reach a perceptual indifference point across all conditions. We found no overall effect of group on the trials needed to reach a perceptual indifference point ( $F_{2,88}=.442$ ,  $p=.64$ ) (HCS: 18.5, SE: 0.6; ARMS: 18.9, SE:0.6; FEP: 18.1, SE: 0.6). However, we did find an effect of prior condition ( $F_{2,88}=3.558$ ,  $p=.033$ ). Needing significantly fewer trials in the DA condition (17.6, SE: 0.5) than in the visual BA (19.5 SE: 0.5) ( $T_{180}=2.63$ ,  $p=.018$ ) but not the reference condition (18.3, SE: 0.5) ( $T_{180}=1.08$ ,  $p=.56$ , Bonferroni corrected). Importantly, we found no group by condition interaction ( $F_{4,176}=.267$ ,  $p=.90$ ). Thus, the patient groups did not differ in terms of the trials needed to reach indifference points.

#### **1.3.2.3. Cognitive priors shifted the perceptual indifference points in the expected direction**

In order to assess the main effect of cognitive priors, each perceptual indifference point of the two cognitive prior conditions was subtracted from its own reference condition. We found that the cognitive BA prior lowered the value of  $\omega^{Ba}$  by .042 ( $z_{val} = -5.2$ ,  $p < .0001$ ), and for the cognitive DA prior the value of  $\omega^{Ba}$  was increased by .027 ( $z_{val} = 3.7$ ,  $p = .0002$ ). This shows that there was indeed a main effect of cognitive priors on perceptual indifference points. For the remainder of the analyses, the degree of influence of the BA and DA cognitive priors were added together and



averaged in order to create a single measure of cognitive prior strength (see Figure 6B).

#### **1.3.2.4. *Effect of cognitive priors in the FEP group was significantly higher than the ARMS and controls***

To study the differences in a more unbiased fashion, we used a non-parametric ANOVA. The differences between the average strength of the cognitive priors was significant (Independent-Samples Kruskal-Wallis Test:  $p=.023$ ). Using a post-hoc Bonferroni corrected Wilcoxon rank sum test, we found stronger usage of cognitive priors in the FEP group compared to both the HCS group ( $z$ -val: 2.35, ranksum: 840,  $p=.037$ ), and the ARMS group ( $z$ -val: 2.35, ranksum: 714,  $p=.037$ ).

We also analysed the cognitive prior data in a Bayesian fashion, and found that an ANOVA revealed moderate evidence in support for a difference across groups ( $BF=7.5$ ). Independent-sample  $t$ -tests revealed moderate evidence in favour of no difference between ARMS and healthy controls ( $BF=3.5$ ), but moderate evidence in favour of a difference between healthy controls and FEP ( $BF=3.5$ ). There was also anecdotal evidence for a difference between ARMS and FEP ( $BF=2.8$ ) (Figure 7B, 7D).

#### **1.3.3. *Perceptual priors had a stronger effect on perception than cognitive priors and were differently correlated across groups***

Finally, we analysed whether the strength of the priors was different between tasks. This was indeed the case, showing a stronger effect of perceptual priors (.37) compared to the cognitive priors across all groups (.07) ( $T\{90\}=-14.34$ ,  $p<.0001$ ). Subsequently, we tested whether the strength of cognitive and perceptual priors was correlated using a Spearman correlation. This was indeed the case ( $Rho=.24$ ,  $p<.02$ ). When exploring the correlations separate for each group, we found a negative (trend-level) correlation in the ARMS group ( $Rho=-.33$ ,  $p=.08$ ), and positive correlations in the HC ( $Rho=.52$ ,  $p=.002$ ) and (trend-level) in the FEP group ( $Rho=.30$ ,  $p=.10$ ). Using a Fisher  $r$ -to- $z$  transformation We found that the relationship was significantly different for the ARMS group compared to the healthy control group ( $Z=-3.28$ ,  $p=.001$ ), and FEP group ( $Z=-2.25$ ,  $p=.024$ ). The correlation between healthy controls and FEP was not significantly different ( $Z=1.0$ ,  $p=.31$ ). As these findings

constituted secondary analyses, they are not properly controlled for multiple comparisons. When controlling for multiple tests, only the relationship in the healthy control group remains significant.

#### **1.3.4. *Glutamate levels correlate with cognitive priors in HC and perceptual priors in FEP***

Correlations with glutamate were tested in a subset of participants, namely 18 healthy controls, 19 ARMS, and 14 FEP patients. We looked for a correlation across all participants between glutamate levels and the strength of the perceptual and cognitive priors, but found no significant correlation (perceptual:  $Rho=.18$ ,  $p=.21$ , cognitive:  $Rho=.17$ ,  $p=.23$ ). When exploring the correlations in the separate patient groups We found that there is a significant positive relationship between glutamate levels and cognitive priors in the control group ( $Rho=.53$ ,  $p=.023$ ), but not with perceptual priors ( $Rho=.294$ ,  $p=.24$ ). In the ARMS group no significant correlations were found for either cognitive ( $Rho=.0$ ,  $p=1$ ) or perceptual priors ( $Rho=.07$ ,  $p=.78$ ). In the FEP group a significant correlation was found with perceptual ( $Rho=.57$ ,  $p=.035$ ) but not cognitive priors ( $Rho=.43$ ,  $p=.128$ ). As these findings were secondary to the core hypothesis in the present chapter, they were not corrected for multiple comparisons. The effects do not remain significant when they are controlled for multiple comparisons. (See Figures 8 and 9).

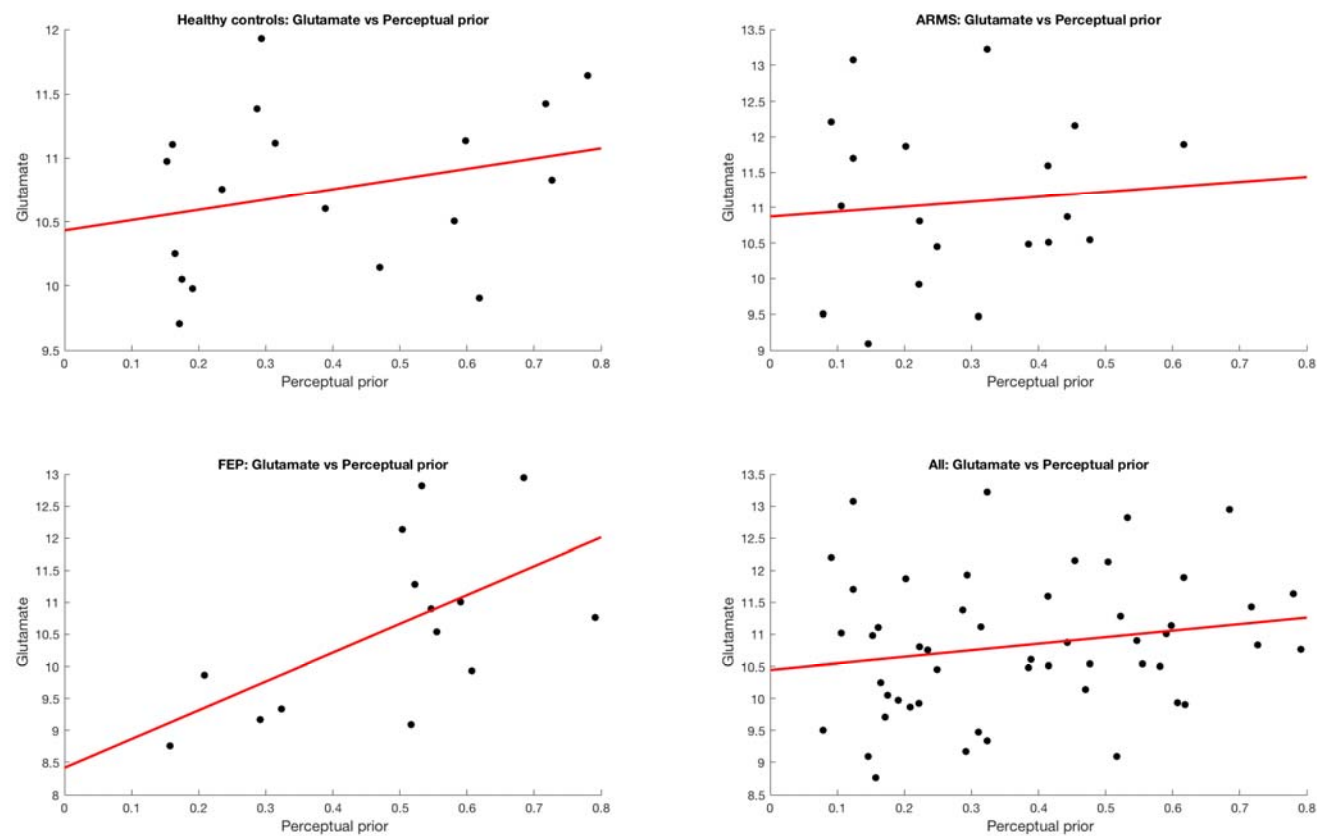

Figure 8: Correlations between perceptual prior strength and glutamate levels for all groups

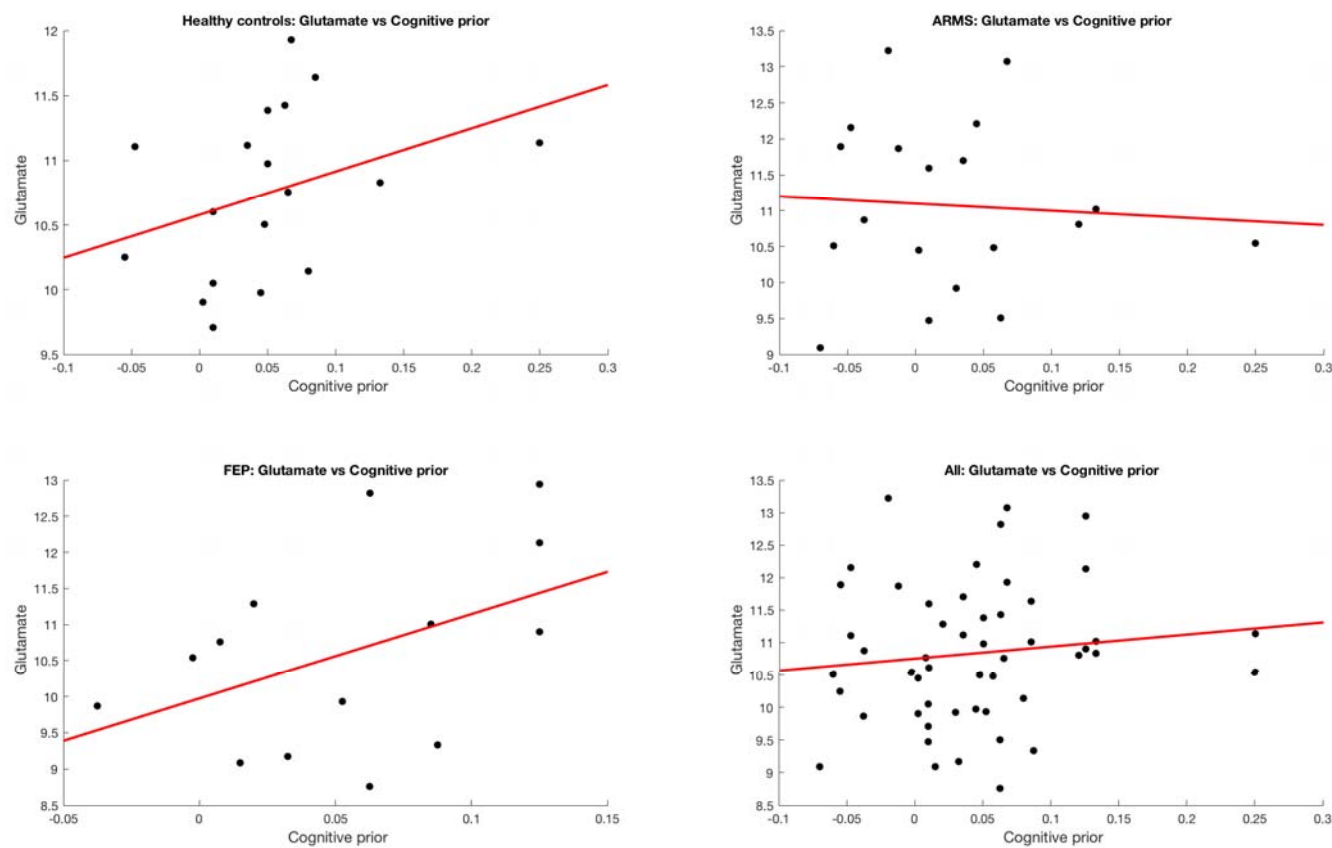

Figure 9: Correlations between cognitive prior strength and glutamate levels for all groups

**1.3.5. Stronger cognitive priors are associated with delusion ideation in ARMS and weaker perceptual priors is associated with delusion ideation and hallucinations in FEP**

To explore the relationship between the usage of sensory and cognitive priors and the relation with symptoms, we computed Spearman correlations within the different experimental groups (Table 2).

In brief, we found that an increase in cognitive prior use was associated with delusion ideation in ARMS, whereas a decrease in the usage of perceptual priors was associated with perceptual abnormalities and delusion ideation in the FEP group.

Table 2: Correlations between abnormal perception and belief and usage if sensory and cognitive priors across all groups.

|      | ARMS              |                   | FEP                |                   | ARMS+FEP          |                   | HCS               |                  |
|------|-------------------|-------------------|--------------------|-------------------|-------------------|-------------------|-------------------|------------------|
|      | Sensory           | Cognitive         | Sensory            | Cognitive         | Sensory           | Cognitive         | Sensory           | Cognitive        |
| PDI  | p=.44<br>Rho=-.16 | p=.030<br>Rho=.44 | p=.023<br>Rho=-.48 | p=.19<br>Rho=-.29 | p=.09<br>Rho=-.25 | p=.28<br>Rho=-.16 | p=.92<br>Rho=.018 | p=.27<br>Rho=.21 |
| CAPS | p=.84<br>Rho=.044 | p=.87<br>Rho=.037 | p=.008<br>Rho=-.55 | P=.16<br>Rho=-.31 | p=.10<br>Rho=-.24 | p=.86<br>Rho=.03  | p=.06<br>Rho=.34  | p=.56<br>Rho=.11 |

# **1.4.Discussion**

In the present study we found that whether prior expectations have a stronger or weaker effect on perception in psychosis depends on the origin of the prior expectation and the disease stage. We found strong evidence of weakened perceptual priors in the ARMS group compared to the FEP group, and some evidence of ARMS versus controls differences. In contrast, when comparing cognitive priors we found that the FEP group had stronger priors compared to the ARMS and healthy control group, whereas the healthy controls and ARMS group did not differ from each other.

The present findings can be interpreted in the hierarchical predictive coding framework. This framework suggests that the brain models the world by making predictions about upcoming sensory input, that are subsequently updated by discrepancies between the predictions regarding the sensory input and the actual sensory input, termed the prediction error (Knill et al., 2004; Friston, et al., 2005 & 2009; Rao et al., 1999; Bastos et al., 2012; Clark et al., 2013; Hohwy, 2014). In these models, abnormal perception and delusional beliefs can be expected to occur when the balance between the prior expectations and sensory input is shifted (Fletcher & Frith, 2009), as was found in the present experiment. That is, sensory input can come to dominate perception, likely resulting in the subjective experience of being overwhelmed by their sensory environment and attributing importance to otherwise irrelevant stimuli, as is sometimes reported in the early, including prodromal, stages of psychosis (Corlett et al., 2010, McGhie and Chapman, 1961; Bowers and Freedman, 1966; Freedman, 1974; Matussek, 1952).

Our results of abnormally strong high-level priors in first episode psychosis, all of whom had either current or recent delusions, are in accordance with previous postulates (e.g. Adams et al 2013, Sterzer et al 2018). We further note that high level, cognitive, priors were stronger in established psychosis compared to the ARMS, consistent with previous theory that strong high-level priors may develop subsequent to weak low-level priors (Adams et al 2013, Sterzer et al 2018). As Heinz

et al (2018) reason, “reduced precision of *perceptual beliefs* encoded at low levels, e.g. in sensory cortices, may be compensated by increased precision of more abstract *conceptual beliefs* encoded in higher-level brain circuits.” However, previous theories have not described on what time scale this compensation happens, and no previous studies have examined over what time scale or at what stages in psychotic illness this may occur. Our data suggest that this compensation may not necessarily be instant, but might develop over time, possibly in the transition from the prodromal stage (ARMS) to frank psychosis (FEP).

A recent study examining the influence of prior expectations on auditory perception used a conditioning paradigm to study aberrancies in healthy voice hearers, voice hearers with psychotic illness, and psychotic illness without voice hearing (Powers et al., 2017). Individuals who heard voices were susceptible to report hearing a sound when none was present following a previously associated cue. Computational modelling showed that individuals with psychotic illness had difficulties learning that a cue failed to predict a sound, sticking to their prior expectations, whereas individuals who heard voices but did not have psychotic illness did recognise volatility and were able to alter high-level beliefs. This might in part explain why we only see an effect of the cognitive priors in the psychosis group, but not in the at-risk mental state group, who, although help-seeking, do not (yet) have psychotic illness. Because the current paradigm involves a staircase experiment, we only pick up strong effects of prior expectations in individuals who remain influenced by the priors towards the end of the experiment. The individuals at-risk for psychosis might have been influenced in the task early on, but changed their expectations regarding the validity of the cue later on. Since our key-variable is the influence of the priors at convergence, we might have been unable to pick this up.

It has been argued that there might be a relationship between early sensory processing deficits and high level deficits in schizophrenia (Leitman et al., 2009). This raises the question what the exact nature of this exact relationship is and whether it might be relevant in understanding the development of psychosis. Whilst in the sample as a whole, cognitive and perceptual prior strengths were weakly ( $\rho=0.24$ ),

but significantly, correlated, the strengths of the correlations were significantly different across groups. Although we acknowledge the caveat that within group correlations were of secondary interest in this study, and not well powered, the fact that the group comparisons in strengths of priors were sensitive to whether priors were high or low level provides supporting evidence that level of priors does matter in this research context. Weaker perceptual priors in ARMS were negatively correlated with stronger cognitive priors, whereas in FEP and healthy controls, and the sample as a whole, the correlation was positive. We speculate on the possibility that an increase in the influence of cognitive priors on perception is an adaptation to early visual processing deficits in the at-risk group. This increase in cognitive priors subsequently could potentially act to counter the decrease in diminishment of perceptual priors explaining the positive correlation that is observed in the FEP group. This increase in cognitive priors may manifest themselves as delusions on the phenomenological level as can be seen in both the strong cognitive priors in FEP, and in the correlation with symptom severity in the ARMS group. Subsequently, if perceptual priors remain low in the FEP stage, this is correlated to worse symptomology, suggesting a failure for the brain to deal with a change in the perceptual system may be important for psychopathology severity in this stage of the illness. Interestingly, in the FEP stage there is no correlation between cognitive priors and symptoms, possibly due to noise added to the data through the effects of treatment, recovery in some, and delusional belief formation being an attempt at making sense of a changing sensory world (Mishara & Corlett, 2009). Overall, our data emphasize the importance of distinguishing between priors at high and low levels of the cognitive hierarchy (Schmack et al 2013).

We conclude that the initial stages of psychosis may be characterised by a weakening of lower-level perceptual priors. Compensatory neural systems changes may lead to deploying stronger higher-level priors in order to deal with the increased strong drive on perceptual input. These changes might be associated with formation of delusional beliefs (as supported by the correlations with symptoms). If this compensatory strategy is effective, the weakened perceptual priors may be restored throughout development. If ineffective, the perceptual priors remain weak and



psychotic symptoms maintain (as supported by the correlations with symptoms). This model is described in Figure 10, where in red and blue the strength of perceptual and cognitive priors are depicted respectively over time in psychosis, in which the dotted line indicates worse clinical outcome in some patients. This model can be tested in longitudinal designs to clarify the temporal and causal relationship between the different priors.

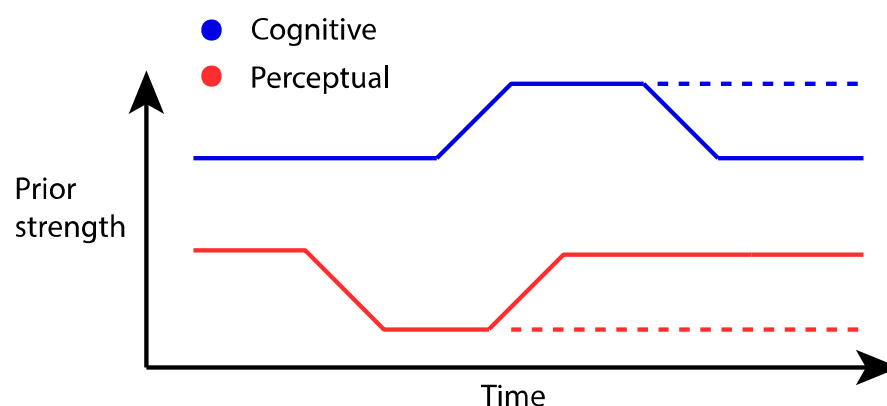

Figure 10: A proposed model for the interaction between different levels of prior over time in psychosis. The early stages of psychosis might be characterized by a weakening of lower-level perceptual priors as indicated by a fall in the lower red line. This causes a shift in the strength of cognitive priors as an attempt to explain the abnormal perceptual experiences, causing positive symptoms of psychosis. This will counter the weakening of lower-level priors. A failure to attenuate the weakening of lower-level priors may result in more severe, sustained symptoms as indicated by the dashed lines.

Two previous studies have looked at the McGurk effect in schizophrenia. White et al (2009) found that patients were, on average, less vulnerable to the illusion than controls, with a strong relationship with duration of illness, such that individuals who have been ill for longer were less likely to report a McGurk effect (White et al., 2014). Pearl et al (2009) used a more complex recruitment design and had more mixed results that interacted in a complex fashion with age; the interpretation of their patient results are made challenging given that results in controls interacted with age in an unexpected manner. In these previous studies participants were required to report binary choices on whether they perceived the McGurk effect, whereas we used a staircase procedure to examine the degree of influence that lip-movements have on auditory perception. We did not find a diminishment in the

degree that lip-movements influenced auditory perception in psychosis patients. This might relate to differences in methodology, or perhaps to the age difference between our study (mean age 24.9 years) and White's study (mean age 39.0 years), given that the absence of illusory effect was more marked in White et al's older patients with longer disease duration. Further studies looked at the ability for schizophrenia patients to use lip-movements to understand written speech, which found aberrancies in schizophrenia, while general lip-reading capabilities remained intact (Myslobodsky et al., 1992; de Gelder et al., 2002; Ross et al., 2007; Pearl et al., 2009; Szycik et al., 2013). Again, the patient groups in these studies consisted of schizophrenia patients who were older and in a more chronic phase than in the present sample, potentially explaining the discrepancy with the present study.

It has been proposed that glutamatergic abnormalities may be prominent in the early stages of psychotic illness (Merritt et al 2016, Kumar et al 2018), and that these may be key in driving pathophysiology of illness, predictive processing dysfunction, and psychopathology (Corlett et al., 2009 & 2011; Sterzer et al 2018). We did not find a significant relationship between glutamate levels in the anterior cingulate cortex and the strength of the perceptual and cognitive priors across all participants. However, when we analysed the groups separately we did find that in the healthy group there was a significant positive relationship between glutamate levels and cognitive priors, and in the FEP group a significant relationship between glutamate levels and perceptual priors. This relationship between glutamate levels and perceptual priors in the FEP group is interesting as the correlations suggest that a (sustained) weakening of perceptual priors is particularly relevant to FEP symptomology, and thus glutamate might play a role in having sustained weakened perceptual priors. The absence of a correlation with the cognitive priors might be due to a lack of power, as a successful glutamate scan was only acquired from 14 individuals who had first episode psychosis.

As with all studies that use the at-risk-mental-state construct, there is an inherent limitation in terms of the inability to prospectively determine whether an at-risk

individual will develop a first episode of psychosis. Therefore, future studies would benefit from following up individuals determined to be in the at-risk group, and explore the predictive validity of a change in the usage of priors.

Extending this research beyond the field of psychosis, we note that autism has been suggested to also be associated with a weakening of priors, but which usually does not develop into psychotic symptoms (Pellicano et al., 2012; van Boxtel et al., 2013; Lawson et al., 2014), although there are increased rates of psychotic symptoms in autism and other neurodevelopmental disorders (Hussain and Murray 2015; Larson et al., 2017). The difference between schizophrenia spectrum psychosis and autism may lie in the fact that autism presents itself in early childhood, whereas schizophrenia spectrum illness typically develops later in adolescence. The consequence of this is that during the emergence of schizophrenia spectrum psychosis the brain has to explain a changing world, whereas the sensory driven world autism is characterized by presents itself at birth, requiring no changes in the model of the world to form (i.e. no formation of delusional beliefs), yet the experience of being overwhelmed by sensory experiences remains. Future experiments would need to use a longitudinal approach to support this hypothesis, namely that psychosis is preceded by a decrease in the influence of perceptual priors on perception, followed by a normalization accompanied by an increase in higher-level cognitive priors, whereas autism has weakened priors from birth. In order to test such hypotheses, longitudinal paradigms are preferred which require potentially large groups of people. In order to acquire such amounts of data, the possibility of online testing could be considered, for which the present experiments are well adapted too, due to the simplicity of the paradigm and the brief duration of the experiments (10 minutes each).

In conclusion, we found that the influence of perceptual priors might be weakened in the early stages of psychosis but not in the later stages, whereas cognitive priors are strengthened in the later stages but not early stages. We therefore suggest that previous reported inconsistencies in the literature regarding the influence of prior expectations on sensory processing might be due to differences in the origin of the

prior expectation and the disease stage. Furthermore, changes in perceptual and cognitive priors might interact with each other throughout the development of psychosis and glutamate might play a mediating role in the process.

**Author roles:** JH: conceptualization (lead role), methodology (lead role), software, formal analysis, investigation, writing (original draft preparation, review and editing). FK: formal analysis, supervision, writing (original draft preparation, review and editing). JG: conceptualization, methodology, investigation, formal analysis, writing (review and editing). HT: investigation, formal analysis, writing (review and editing). MM: investigation, methods, formal analysis, writing (review and editing). IG: supervision, project administration, funding acquisition. PCF: conceptualization, project administration, funding acquisition, writing (review and editing). GKM, conceptualization, project administration, methodology, supervision, writing (original draft preparation, review and editing)

**Conflicts of Interest:** P.C.F. has received payments in the past for ad hoc consultancy services to GlaxoSmithKline All other authors declare no competing interests.

**Funding:** This work was supported by the Neuroscience in Psychiatry Network, a strategic award from the Wellcome Trust to the University of Cambridge and University College London (095844/Z/11/Z), Wellcome Trust (093270) Bernard Wolfe Health Neuroscience Fund (P.C.F.), and the Cambridge NIHR Biomedical Research Centre.

### **Acknowledgements**

We would like to thank Owen Parsons with his help in designing the paradigm, Rachel Anderson and Eleanor van Sprang for their help in data collection, CAMEO staff for help with recruitment, and the participants.

# References

- Adams, R. A., Stephan, K. E., Brown, H. R., Frith, C. D., & Friston, K. J. (2013). The Computational Anatomy of Psychosis. *Frontiers in Psychiatry*, 4.
- Agathon M, Roussel A (1973): [Use of a sensory conditioning test in patients treated with psychotropic drugs]. *Int Pharmacopsychiatry* 8:221–233.
- Arnal, L. H., Wyart, V., & Giraud, A.-L. (2011). Transitions in neural oscillations reflect prediction errors generated in audiovisual speech. *Nature Neuroscience*, 14(6), 797–801.
- Bastos, A. M., Usrey, W. M., Adams, R. A., Mangun, G. R., Fries, P., & Friston, K. J. (2012). Canonical Microcircuits for Predictive Coding. *Neuron*, 76(4), 695–711.
- Bell, V., Halligan, P. W., & Ellis, H. D. (2006). The Cardiff Anomalous Perceptions Scale (CAPS): A new validated measure of anomalous perceptual experience. *Schizophrenia Bulletin*, 32(2), 366–377. <http://doi.org/10.1093/schbul/sbj014>
- Blank, H., & Davis, M. H. (2016). Prediction Errors but Not Sharpened Signals Simulate Multivoxel fMRI Patterns during Speech Perception. *PLoS Biology*, 14(11), e1002577.
- Bowers Jr., M. B. (1968). Pathogenesis of acute schizophrenic psychosis. An experimental approach. *Archives of General Psychiatry*, 19(3), 348–355
- Van Boxtel, J. J., & Lu, H. (2013). A predictive coding perspective on autism spectrum disorders. *Frontiers in psychology*, 4, 19.
- Brogden WJ (1947): Sensory pre-conditioning of human subjects. *J Exp Psychol* 37:527–539
- Clark, A. (2013). Whatever next? Predictive brains, situated agents, and the future of cognitive science. *Behavioral and Brain Sciences*, 36(3), 181–204.
- Clark, A. (2015). *Surfing uncertainty: Prediction, action, and the embodied mind*. Oxford University Press.
- Corlett, P. R., Frith, C. D., & Fletcher, P. C. (2009). From drugs to deprivation: A Bayesian framework for understanding models of psychosis. *Psychopharmacology*.
- Corlett, P. R., Honey, G. D., Krystal, J. H., & Fletcher, P. C. (2011). Glutamatergic model psychoses: prediction error, learning, and inference. *Neuropsychopharmacology*, 36(1), 294.
- Cornsweet, T. N. (1962). The staircase-method in psychophysics. *The American journal of psychology*, 75(3), 485-491.
- Davies, D.J. (2017). Latent class analysis of healthy cohort reveals different subgroups of psychosis vulnerability. (Unpublished).
- Egerton, A., Stone, J. M., Chaddock, C. A., Barker, G. J., Bonoldi, I., Howard, R. M., ... & McLean, M. A. (2014). Relationship between brain glutamate levels and clinical outcome in individuals at ultra high risk of psychosis. *Neuropsychopharmacology*, 39(12), 2891-2899.
- Ellson, D. G. (1941). Hallucinations produced by sensory conditioning. *Journal of Experimental Psychology*, 28(1), 1.

- Fletcher, P. C., & Frith, C. D. (2009). Perceiving is believing: a Bayesian approach to explaining the positive symptoms of schizophrenia. *Nature Reviews Neuroscience*, 10(1), 48–58.
- Freedman, B., & Chapman, L. J. (1973). Early subjective experiences in schizophrenic episodes. *Journal of abnormal psychology*, 82(1), 46.
- Friston, K. (2005). A theory of cortical responses. *Philosophical Transactions of the Royal Society of London. Series B, Biological Sciences*, 360(1456), 815–36.
- Friston, K. (2009). The free-energy principle: a unified brain theory? *Nature Reviews. Neuroscience*, 11(2), 127–138.
- de Gelder, B., Vroomen, J., Annen, L., Masthof, E., & Hodiamont, P. (2003). Audio-visual integration in schizophrenia. *Schizophrenia research*, 59(2), 211-218.
- Heinz, A., Murray, G.K., Schlagenhauf, F., Sterzer, P., Grace, A.A., Waltz, J.A., (2018) Towards a Unifying Cognitive and Computational Neuroscience Account Of Psychotic Experience. *Biorxiv*
- Hohwy, J. (2013). *The predictive mind*. Oxford University Press.
- Hussain, H., & Murray, G. K. (2015). Common childhood neurodevelopmental disorders are associated with increased risk of psychotic experiences in early adolescence. *Evidence-based mental health*, 18(2), 51.
- Kay, S. R., Opler, L. A., & Lindenmayer, J. P. (1989). The Positive and Negative Syndrome Scale (PANSS): Rationale and standardisation. *British Journal of Psychiatry*.
- Knill, D. C., & Pouget, A. (2004). The Bayesian brain: The role of uncertainty in neural coding and computation. *Trends in Neurosciences*, 27(12), 712–719.
- Kot, T., & Serper, M. (2002). Increased susceptibility to auditory conditioning in hallucinating schizophrenic patients: a preliminary investigation. *The Journal of nervous and mental disease*, 190(5), 282-288.
- Kumar, J., Liddle, E. B., Fernandes, C. C., Palaniyappan, L., Hall, E. L., Robson, S. E., ... & Skelton, M. (2018). Glutathione and glutamate in schizophrenia: a 7T MRS study. *Molecular Psychiatry*, 1.
- Larson, F. V., Wagner, A. P., Jones, P. B., Tantam, D., Lai, M. C., Baron-Cohen, S., & Holland, A. J. (2017). Psychosis in autism: comparison of the features of both conditions in a dually affected cohort. *The British Journal of Psychiatry*, 210(4), 269-275.
- Lawson, R. P., Rees, G., & Friston, K. J. (2014). An aberrant precision account of autism. *Frontiers in human neuroscience*, 8, 302.
- Leitman, D. I., Sehatpour, P., Higgins, B. A., Foxe, J. J., Silipo, G., & Javitt, D. C. (2010). Sensory deficits and distributed hierarchical dysfunction in schizophrenia. *American Journal of Psychiatry*, 167(7), 818-827.
- Marsman, A., van den Heuvel, M. P., Klomp, D. W., Kahn, R. S., Luijten, P. R., & Hulshoff Pol, H. E. (2011). Glutamate in schizophrenia: a focused review and meta-analysis of 1H-MRS studies. *Schizophrenia bulletin*, 39(1), 120-129.

- McGhie, A. N. D. R. E. W., & Chapman, J. (1961). Disorders of attention and perception in early schizophrenia. *Psychology and Psychotherapy: Theory, Research and Practice*, 34(2), 103-116.
- McGurk, H., & MacDonald, J. (1976). Hearing lips and seeing voices. *Nature*, 264(5588), 746-748.
- Merritt, K., Egerton, A., Kempton, M. J., Taylor, M. J., & McGuire, P. K. (2016). Nature of glutamate alterations in schizophrenia: a meta-analysis of proton magnetic resonance spectroscopy studies. *JAMA psychiatry*, 73(7), 665-674.
- Mishara, A. L., & Corlett, P. (2009). Are delusions biologically adaptive? Salvaging the doxastic shear pin. *Behavioral and Brain Sciences*, 32(6), 530-531.
- Myslobodsky, M. S., Goldberg, T., Johnson, F., Hicks, L., & Weinberger, D. R. (1992). Lipreading in patients with schizophrenia. *The Journal of nervous and mental disease*, 180(3), 168-171.
- Pearl, D., Yodashtkin-Porat, D., Katz, N., Valevski, A., Aizenberg, D., Sigler, M., ... Kikinzon, L. (2009). Differences in audiovisual integration, as measured by McGurk phenomenon, among adult and adolescent patients with schizophrenia and age-matched healthy control groups. *Comprehensive Psychiatry*, 50(2), 186-192.
- Peters, E. R., Joseph, S. A., & Garety, P. A. (1999). Measurement of delusional ideation in the normal population: introducing the PDI (Peters et al. Delusions Inventory). *Schizophrenia bulletin*, 25(3), 553-576.
- Powers, A. R., Mathys, C., & Corlett, P. R. (2017). Pavlovian conditioning-induced hallucinations result from overweighting of perceptual priors. *Science*, 357(6351), 596-600.
- Rao, R. P. N., & Ballard, D. H. (1999). Predictive coding in the visual cortex: a functional interpretation of some extra-classical receptive-field effects. *Nature Neuroscience*, 2(1), 79-87.
- Ripke, S., Neale, B. M., Corvin, A., Walters, J. T., Farh, K. H., Holmans, P. A., ... & Pers, T. H. (2014). Biological insights from 108 schizophrenia-associated genetic loci. *Nature*, 511(7510), 421.
- Pellicano, E., & Burr, D. (2012). When the world becomes 'too real': a Bayesian explanation of autistic perception. *Trends in cognitive sciences*, 16(10), 504-510.
- Ross, L. A., Saint-Amour, D., Leavitt, V. M., Molholm, S., Javitt, D. C., & Foxe, J. J. (2007). Impaired multisensory processing in schizophrenia: deficits in the visual enhancement of speech comprehension under noisy environmental conditions. *Schizophrenia research*, 97(1), 173-183.
- Schmack, K., de Castro, A. G. C., Rothkirch, M., Sekutowicz, M., Rössler, H., Haynes, J. D., ... & Sterzer, P. (2013). Delusions and the role of beliefs in perceptual inference. *Journal of Neuroscience*, 33(34), 13701-13712.
- Schmack, K., Schnack, A., Priller, J., & Sterzer, P. (2015). Perceptual instability in schizophrenia: Probing predictive coding accounts of delusions with ambiguous stimuli. *Schizophrenia Research: Cognition*, 2(2), 72-77.
- Schmack, K., Rothkirch, M., Priller, J., & Sterzer, P. (2017). Enhanced predictive signalling in schizophrenia. *Human brain mapping*, 38(4), 1767-1779.
- Shergill, S. S., Samson, G., Bays, P. M., Frith, C. D., & Wolpert, D. M. (2005). Evidence for sensory prediction deficits in schizophrenia. *American Journal of Psychiatry*, 162(12), 2384-



- Sterzer, P., Adams, R.A., Fletcher, P., Frith, C., Lawrie, S.M., Muckli, L., Petrovic, P., Uhlhaas, P., Voss, M. and Corlett, P.R. (2018). The predictive coding account of psychosis. *Biological Psychiatry*.
- Szyck, G. R., Ye, Z., Mohammadi, B., Dillo, W., Wildt, B. T. T. E., Sami, A., ... Gelder, D. (2013). MALADAPTIVE CONNECTIVITY OF BROCA'S AREA IN SCHIZOPHRENIA DURING AUDIOVISUAL SPEECH PERCEPTION: AN FMRI STUDY, 253, 274–282.
- Teufel, C., Kingdon, A., Ingram, J. N., Wolpert, D. M., & Fletcher, P. C. (2010). Deficits in sensory prediction are related to delusional ideation in healthy individuals. *Neuropsychologia*, 48(14), 4169–4172. <http://doi.org/10.1016/j.neuropsychologia.2010.10.024>
- Teufel, C., Subramaniam, N., Dobler, V., Perez, J., Finnemann, J., Mehta, P. R., ... Fletcher, P. C. (2015). Shift toward prior knowledge confers a perceptual advantage in early psychosis and psychosis-prone healthy individuals. *Proceedings of the National Academy of Sciences*, 112(43), 13401–13406.
- Treen, D., Batlle, S., Mollà, L., Forcadell, E., Chamorro, J., Bulbena, A., & Perez, V. (2016). Are there glutamate abnormalities in subjects at high risk mental state for psychosis? A review of the evidence. *Schizophrenia research*, 171(1), 166-175.
- Warburton, D. M., Wesnes, K., Edwards, J., & Larrad, D. (1985). Scopolamine and the sensory conditioning of hallucinations. *Neuropsychobiology*, 14(4), 198-202.
- White, T. P., Wigton, R. L., Joyce, D. W., Bobin, T., Ferragamo, C., Wasim, N., ... Shergill, S. S. (2014). Eluding the illusion? Schizophrenia, dopamine and the McGurk effect. *Frontiers in Human Neuroscience*, 8(August), 565.
- Yung, A. R., Yuen, H. P., Phillips, L. J., Francey, S., & McGorry, P. D. (2003). Mapping the onset of psychosis: The comprehensive assessment of at-risk mental states (CAARMS). *Schizophrenia Research*, 60(1), 30–31.
